# Supplementary material for: Sympatho–Vagal Dysfunction in Patients with End-Stage Lung Disease Awaiting Lung Transplantation
Source: PubMed Central journal article supplement (PMC7230240; doi:10.3390/jcm9041146), 2020-04-17
Supplement: jcm-09-01146-s001.pdf [file jcm-09-01146-s001.pdf]

**Table S1.** Comparison of autonomic parameters evaluated by symbolic analysis between patients affected by cystic fibrosis (CF) and patients affected by other diseases (non-CF).

|                           | CF<br>n = 32 | non-CF<br>n = 17 | <i>p</i> |
|---------------------------|--------------|------------------|----------|
| <b>0V%, mean (SD)</b>     | 23 (± 15)    | 30 (± 16)        | 0.129    |
| <b>2LV%, median (IQR)</b> | 10 (4 - 14)  | 6 (2 - 7)        | 0.06     |
| <b>2UV%, median (IQR)</b> | 18 (9 - 27)  | 22 (12 - 25)     | 0.5      |

CF, cystic fibrosis; non-CF, affected by other pathologies; n, number; SD, standard deviation; IQR 25-75, interquartile range.

**Table S2.** Comparison of autonomic parameters evaluated by symbolic analysis between patients affected by cystic fibrosis (CF) and affected by other diseases (non-CF); only patients with a LAS lower than the median LAS of the whole sample are considered.

|                          | CF<br>n = 16 | non-CF<br>n = 9 | <i>p</i> |
|--------------------------|--------------|-----------------|----------|
| <b>0V%, mean (SD)</b>    | 28 (± 16)    | 36 (± 11)       | 0.182    |
| <b>2LV%, median (SD)</b> | 8 (± 5)      | 4 (± 2)         | 0.052    |
| <b>2UV%, median (SD)</b> | 17 (± 11)    | 18 (± 7)        | 0.926    |

CF, cystic fibrosis; non-CF, affected by other pathologies; n, number; SD, standard deviation.

**Table S3.** Comparison of autonomic parameters evaluated by symbolic analysis between patients affected by cystic fibrosis (CF) and affected by other diseases (non-CF); only patients with a LAS higher than the median LAS of the whole sample are considered.

|                           | CF<br>n = 16 | non-CF<br>n = 8 | <i>p</i> |
|---------------------------|--------------|-----------------|----------|
| <b>0V%, mean (SD)</b>     | 23 (± 17)    | 14 (± 11)       | 0.174    |
| <b>2LV%, median (SD)</b>  | 11 (± 7)     | 13 (± 9)        | 0.62     |
| <b>2UV%, median (IQR)</b> | 18 (9 - 25)  | 25 (18 - 29)    | 0.17     |

CF, cystic fibrosis; non-CF, affected by other pathologies; n, number; SD, standard deviation; IQR 25-75, interquartile range.
